# Supplementary material for: NtGNL1a ARF-GEF acts in endocytosis in tobacco cells
Source: PubMed Central journal article supplement (PMC4635988; doi:10.1186/s12870-015-0621-3), 2015-11-05

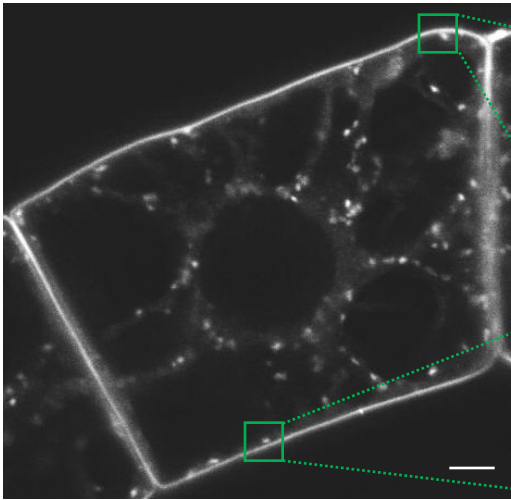

PM-associated vesicle

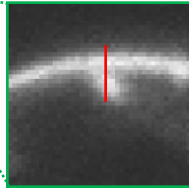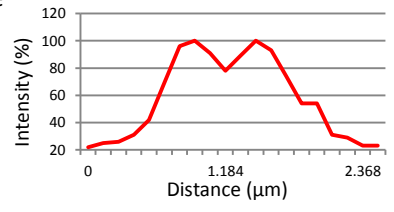

PM-unassociated vesicle

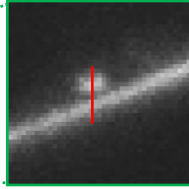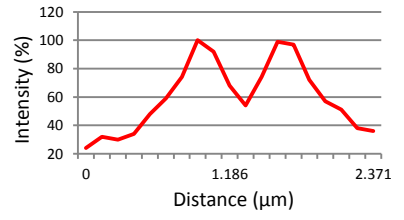

Supplement: 12870_2015_621_MOESM1_ESM.pdf [file 12870_2015_621_MOESM1_ESM.pdf]
