# Supplementary material for: NtGNL1a ARF-GEF acts in endocytosis in tobacco cells
Source: PubMed Central journal article supplement (PMC4635988; doi:10.1186/s12870-015-0621-3), 2015-11-05
Supplement: 12870_2015_621_MOESM3_ESM.pdf [file 12870_2015_621_MOESM3_ESM.pdf]

| Organism       | GenBank<br>Acc.Nr. | Sec7 sequence alignment | BFA-sens./res. |
|----------------|--------------------|-------------------------|----------------|
| <i>NtGNL1a</i> | (KM262188)         | VLSYSLIMLNTDQHNTQVKKKMT | sensitive      |
| <i>NtGNL1a</i> | (EF520731)         | VLSYSLIMLNTDQHNTQVKKKMT | sensitive      |
| <i>N.tom.</i>  | (XM_009626976)     | VLSYSLIMLNTDQHNTQVKKKMT | sensitive      |
| <i>N.s.</i>    | (XM_009790920)     | VLSYSLIMLNTDQHNTQVKKKMT | sensitive      |
| <i>N.tom.</i>  | (XM_009630659)     | LLSYSLIMLNTDQHNTQVKKKMT | sensitive      |
| <i>N.s.</i>    | (XM_009791036)     | LLSYSLIMLNTDQHNTQVKKKMT | sensitive      |
| <i>N.tom.</i>  | (XM_009604876)     | VLSYSVIMLNTDQHNQVKKKMT  | sensitive      |
| <i>N.s.</i>    | (XM_009762979)     | VLSYSVIMLNTDQHNQVKKKMT  | sensitive      |
| <i>N.tom.</i>  | (XM_009627478)     | LLSYSIIMLNTDQHNQVKKKMT  | sensitive      |
| <i>N.s.</i>    | (XM_009791968)     | LLSYSIIMLNTDQHNQVKKKMT  | sensitive      |
| <i>N.tom.</i>  | (XM_009598897)     | ILCYSVIMLNTDQHNPVKKKMT  | sensitive      |
| <i>N.s.</i>    | (XM_009790966)     | ILCYSVIMLNTDHHNPVKKKMT  | sensitive      |
| <i>N.tom.</i>  | (XM_009614164)     | VLAYSVIMLNTDAHNSMVKDKMT | sensitive      |
| <i>N.s.</i>    | (XM_009796667)     | VLAYSVIMLNTDAHNSMVKDKMT | sensitive      |
| <i>N.tom.</i>  | (XM_009606615)     | VLAYSVI LNTDAHNPVKT KMS | resistant      |
| <i>N.s.</i>    | (XM_009800792)     | VLAYSVI LNTDAHNPVKT KMS | resistant      |
| <i>N.tom.</i>  | (XM_009595906)     | VLAYAVIMLNTDAHNPVWP KMS | resistant      |
| <i>N.s.</i>    | (XM_009801996)     | VLAYAVIMLNTDAHNPVWP KMS | resistant      |
